# Supplementary material for: The Nuclear Receptors of Biomphalaria glabrata and Lottia gigantea: Implications for Developing New Model Organisms
Source: PubMed Central journal article supplement (PMC4388693; doi:10.1371/journal.pone.0121259), 2015-04-07

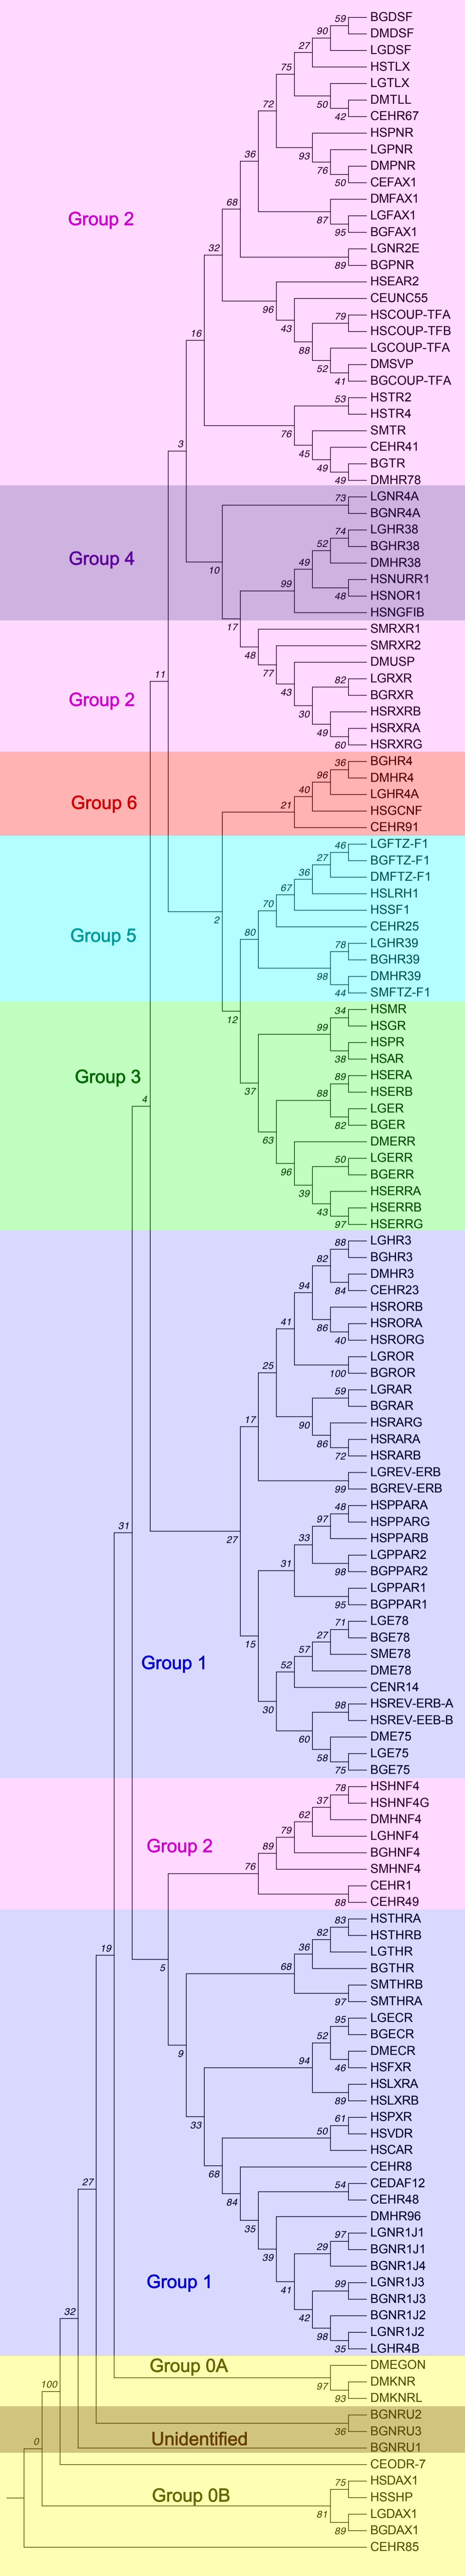

Supplement: pone.0121259.s002.pdf [file pone.0121259.s002.pdf]
