# Supplementary material for: The Nuclear Receptors of Biomphalaria glabrata and Lottia gigantea: Implications for Developing New Model Organisms
Source: PubMed Central journal article supplement (PMC4388693; doi:10.1371/journal.pone.0121259), 2015-04-07
Supplement: pone.0121259.s004.pdf [file pone.0121259.s004.pdf]

**[DBD region]**

BGNRU3 LPPCKICGEP ASGFHYGLNS CGACKGFFLR SLLRPDPYKC STDGKCQVGP  
BGNRU1 LPPCRVCGNK ASGLHFGVNT CEACNEFFRR SLKRGASYC TKNRECQVYG  
BGNRU4 LPPCRVCGDD GAGFHYGVNT CEACKGFFHR SLKVHHLKYC SGSGSCDLTK  
BGNRU2 LPPCRVCDAP GAGFHYGANT CEACKGFFHR SLKLHEQYRC DGEHGCTIE.

**[LBD region]**

BGNRU3 .EIRKICQKC RFDKCLRLAI KIGLGIHNEI ATVIKFFKQI PGFKHLPTSD  
BGNRU1 .KKRNACSYC RYRRCVEMGM SRDEMTEKWL RNYINYAKNV PGFKELALSD  
BGNRU4 IKRQRSCQYC RYQRCVQVGM SKG.....  
BGNRU2 .HGLKLCQLC RYQKCLSVGM GKDIWLENMI RGMVKFAKAI PGFGKVITPD

BGNRU3 QIKLVKGC SH EYHILGLYRG WDNTTRCMTF ATETLTEQDL RKVFP....D  
BGNRU1 QASLVRGTWF EFWFLGAYRG YNSDLRVVYY PNRTFHEEEI IKVFG....K  
BGNRU4 .....  
BGNRU2 KVNLIKYSRQ EFCVFSIYTT LNCELGVMRG GDEWKCEYDI AKAGSFTAFK

BGNRU3 EALSAHIQMV MTLQKLNLS EQIVLLKAIV ATAPDRDILE TVEAVTHIHW  
BGNRU1 EYTDFSFSLA DRMASLRVTP EEMVLIKTVC LTFPDRTPLQ DRDAVESMHW  
BGNRU4 .....  
BGNRU2 EFIEKNFNFC KTLQNLKLTE QEQVVIKAIL IMAPDRFPPV ESSLAHEIYW

BGNRU3 KLVNCLLYLL CKQDLCPVIK FGQIMSVITE MRSYS  
BGNRU1 QMVSCLLHTL EKNRPGDSTV FPMVVNKLVE LRXXX  
BGNRU4 .....  
BGNRU2 YLIKCLLHLL SLNDPKPNLK FAKIISRLTE ARTMT
