# Supplementary material for: The Nuclear Receptors of Biomphalaria glabrata and Lottia gigantea: Implications for Developing New Model Organisms
Source: PubMed Central journal article supplement (PMC4388693; doi:10.1371/journal.pone.0121259), 2015-04-07
Supplement: pone.0121259.s007.pdf [file pone.0121259.s007.pdf]

**Additional file 3**

| Sequence Name | Sequence Description                                                                                          | E value | Hit Accession |
|---------------|---------------------------------------------------------------------------------------------------------------|---------|---------------|
| LgDAX1        | caxs lottia gigantea from radula and heart lottia gigantea cdna clone caxs4873 5 mrna                         | 0       | FC610206      |
| LgTHR         | caxu lottia gigantea from female gonad lottia gigantea cdna clone caxu8659 5 mrna                             | 0       | FC646817      |
| LgRAR         | cbgc lottia gigantea 15h 18h embryos lottia gigantea cdna clone cbgc7034 5 mrna                               | 0       | FC805285      |
| LgPPAR1       | NA                                                                                                            |         |               |
| LgPPAR2       | cbbn lottia gigantea larvae lottia gigantea cdna clone cbbn9244 5 mrna                                        | 0       | FC775242      |
| LgE75         | NA                                                                                                            |         |               |
| LgRev_erb     | cbbn lottia gigantea larvae lottia gigantea cdna clone cbbn8629 5 mrna                                        | 0       | FC774887      |
| LgE78C        | caxw lottia gigantea from female gonad lottia gigantea cdna clone caxw9550 5 mrna                             | 0       | FC673655      |
| LgHR3         | cbbn lottia gigantea larvae lottia gigantea cdna clone cbbn11308 5 mrna                                       | 0       | FC759257      |
| LgROR         | caxx lottia gigantea from male gonad lottia gigantea cdna clone caxx3392 5 mrna                               | 0       | FC692720      |
| LgEcR         | caxx lottia gigantea from male gonad lottia gigantea cdna clone caxx9325 5 mrna                               | 0       | FC701413      |
| LgNR1J1       | NA                                                                                                            |         |               |
| LgNR1J2       | caxp lottia gigantea from radula and heart lottia gigantea cdna clone caxp4376 5 mrna                         | 0       | FC587866      |
| LgNR1J3       | NA                                                                                                            |         |               |
| LgHNF4        | caxp lottia gigantea from radula and heart lottia gigantea cdna clone caxp2428 5 mrna                         | 0       | FC584194      |
| LgRXR         | cbbn lottia gigantea larvae lottia gigantea cdna clone cbbn11953 5 mrna                                       | 0       | FC760240      |
| LgTR          | caxp lottia gigantea from radula and heart lottia gigantea cdna clone caxp1708 5 mrna                         | 0       | FC582901      |
| LgTLX         | NA                                                                                                            |         |               |
| LgDSF         | NA                                                                                                            |         |               |
| LgFAX1        | NA                                                                                                            |         |               |
| LgNR2E        | caxp lottia gigantea from radula and heart lottia gigantea cdna clone caxp7152 5 mrna                         | 0       | FC592666      |
| LgPNR         | NA                                                                                                            |         |               |
| LgCOUP-TFa    | cbbn lottia gigantea larvae lottia gigantea cdna clone cbbn11647 5 mrna                                       | 0       | FC759752      |
| LgER          | caxp lottia gigantea from radula and heart lottia gigantea cdna clone caxp6663 5 mrna                         | 0       | FC591742      |
| LgERR         | cbgc lottia gigantea 15h 18h embryos lottia gigantea cdna clone cbgc18627 5 mrna                              | 0       | FC788262      |
| LgHR38        | NA                                                                                                            |         |               |
| LgNR4a        | caxx lottia gigantea from male gonad lottia gigantea cdna clone caxx755 5 mrna                                | 0       | FC699271      |
| LgFTZ-F1      | CBBN9480.fwd CBBN Lottia gigantea 3,4,5,6.5d Larvae (M) Lottia gigantea cDNA clone CBBN9480 5-, mRNA sequence | 0       | FC775593      |
| LgHR4a        | caxp lottia gigantea from radula and heart lottia gigantea cdna clone caxp4376 5 mrna                         | 0       | FC587866      |
| LgHR4b        | NA                                                                                                            |         |               |
| LgHR39        | NA                                                                                                            |         |               |
| Lg2DBDNR1     | caxx lottia gigantea from male gonad lottia gigantea cdna clone caxx20789 5 mrna                              | 0       | FC689646      |
| Lg2DBDNR2     | NA                                                                                                            |         |               |
